# Supplementary material for: They Don’t Care About Us! Care Personnel’s Perspectives on Ambient Assisted Living Technology Usage: Scenario-Based Survey Study
Source: PubMed Central journal article supplement (PMC6231777; doi:10.2196/10424), 2018-09-24
Supplement: rehab_v5i2e10424_app1.pdf [file rehab_v5i2e10424_app1.pdf]

**Multimedia Appnedix 1.** Descriptive statistics (means and SDs) for the whole sample and the 3 care contexts.

| Construct                                                       | Items (evaluation: min=1; max=6)                                                                                        | Sample (n=170) |     | Geriatric Care |     | Nursing Care |     | Disabled people's Care and Support |     |
|-----------------------------------------------------------------|-------------------------------------------------------------------------------------------------------------------------|----------------|-----|----------------|-----|--------------|-----|------------------------------------|-----|
|                                                                 |                                                                                                                         | M              | SD  | M              | SD  | M            | SD  | M                                  | SD  |
| <i>Attitude toward technical self-efficacy</i> (4 items) (n.s.) | I can solve few technical problems alone, that I am faced with.                                                         | 4.1            | 1.1 | 4.5            | 1.1 | 3.8          | 0.9 | 4.0                                | 1.1 |
|                                                                 | It's fun to crack a technical problem.                                                                                  | 3.4            | 1.6 | 3.8            | 1.6 | 3.1          | 1.3 | 3.2                                | 1.6 |
|                                                                 | Because I have coped well with previous technical problems, I look optimistically forward to future technical problems. | 4.0            | 1.4 | 4.6            | 1.1 | 3.7          | 1.2 | 3.8                                | 1.4 |
|                                                                 | I feel so helpless about technical problems that I prefer to keep my hands off them.                                    | 2.2            | 1.2 | 1.9            | 1.1 | 2.3          | 1.1 | 2.3                                | 1.3 |
|                                                                 | <i>Index: technical self-efficacy</i>                                                                                   | 3.4            | 0.7 | 3.7            | 0.7 | 3.2          | 0.6 | 3.3                                | 0.7 |
| <i>Needs for privacy</i> (6 items) (n.s.)                       | Compared to others, I am more sensitive with regard to handling my data.                                                | 3.9            | 1.2 | 4.2            | 1.2 | 3.6          | 1.2 | 4.0                                | 1.2 |
|                                                                 | Since I have nothing to hide, it does not matter if others know personal information about me.                          | 2.7            | 1.3 | 2.8            | 1.4 | 2.9          | 1.1 | 2.5                                | 1.4 |
|                                                                 | Compared to others I feel it is more important to keep personal information for me.                                     | 4.2            | 1.2 | 4.4            | 1.3 | 4.0          | 1.1 | 4.3                                | 1.1 |
|                                                                 | Compared to others, I am less worried about my privacy.                                                                 | 2.8            | 1.2 | 2.8            | 1.3 | 2.8          | 1.0 | 2.7                                | 1.1 |
|                                                                 | I have no problem giving information about me to others as long as they give me no reason not to do it anymore.         | 3.2            | 1.3 | 3.0            | 1.3 | 3.4          | 1.1 | 3.2                                | 1.4 |
|                                                                 | I have no problem communicating personal information to other people, including strangers.                              | 2.2            | 1.1 | 2.4            | 1.3 | 2.4          | 1.1 | 2.0                                | 1.0 |
| <i>Index: privacy</i>                                           | 4.2                                                                                                                     | 0.9            | 4.3 | 0.9            | 4.0 | 0.8          | 4.3 | 0.9                                |     |
| <i>Inter-personal trust</i> (3 items) (n.s.)                    | In general, most people keep their promises.                                                                            | 3.7            | 0.9 | 3.5            | 1.2 | 3.7          | 0.9 | 3.7                                | 0.8 |
|                                                                 | People usually try to follow their words with deeds.                                                                    | 3.6            | 0.9 | 3.5            | 1.0 | 3.6          | 0.8 | 3.6                                | 0.9 |
|                                                                 | The majority of people are honest in their dealings with others.                                                        | 3.4            | 0.9 | 3.4            | 1.0 | 3.5          | 0.9 | 3.3                                | 1.0 |
|                                                                 | <i>Index: interpersonal trust</i>                                                                                       | 3.5            | 0.8 | 3.5            | 0.9 | 3.6          | 0.7 | 3.5                                | 0.7 |
| <i>Perception of Ambient Assisted Living (AAL) technologies</i> |                                                                                                                         |                |     |                |     |              |     |                                    |     |
| <i>Types of gathered data</i> <sup>a</sup> (14 items)           | Care duration (per person)                                                                                              | 3.0            | 1.6 | 3.1            | 1.8 | 3.2          | 1.3 | 2.9                                | 1.6 |
|                                                                 | Times (rooms are entered or left) <sup>a</sup>                                                                          | 2.9            | 1.4 | 3.0            | 1.7 | <b>3.3</b>   | 1.2 | <b>2.6</b>                         | 1.4 |
|                                                                 | Talks during care                                                                                                       | 2.1            | 1.4 | 2.1            | 1.8 | 2.3          | 1.2 | 2.1                                | 1.3 |
|                                                                 | Cries for help/shouts                                                                                                   | 5.0            | 1.1 | 5.0            | 1.1 | 5.2          | 0.9 | 5.0                                | 1.2 |
|                                                                 | Whole care situations <sup>a</sup>                                                                                      | 2.9            | 1.6 | 3.1            | 1.7 | <b>3.5</b>   | 1.4 | <b>2.6</b>                         | 1.5 |
|                                                                 | Fixations                                                                                                               | 4.1            | 1.6 | 3.9            | 1.8 | 4.5          | 1.4 | 4.0                                | 1.6 |
|                                                                 | Sleeping                                                                                                                | 3.2            | 1.5 | 3.7            | 1.8 | 3.0          | 1.1 | 3.1                                | 1.5 |
|                                                                 | Emergency (falls. epileptic seizures)                                                                                   | 5.3            | 0.9 | 5.5            | 0.7 | 5.4          | 0.7 | 5.2                                | 1.0 |
|                                                                 | 24h observation <sup>a</sup>                                                                                            | 2.6            | 1.6 | <b>2.9</b>     | 1.8 | <b>2.9</b>   | 1.5 | <b>2.3</b>                         | 1.4 |
|                                                                 | Room data (opening windows. doors...)                                                                                   | 4.0            | 1.6 | 3.9            | 1.7 | 4.4          | 1.2 | 4.0                                | 1.6 |
|                                                                 | Position of caretakers <sup>b</sup>                                                                                     | 3.6            | 1.4 | <b>4.0</b>     | 1.5 | <b>4.0</b>   | 1.2 | <b>3.2</b>                         | 1.4 |
|                                                                 | Position of caregivers                                                                                                  | 2.7            | 1.5 | 2.9            | 1.7 | 2.9          | 1.4 | 2.6                                | 1.5 |
|                                                                 | Actuation of emergency button (caretaker)                                                                               | 5.2            | 1.0 | 5.3            | 1.0 | 5.3          | 0.8 | 5.0                                | 1.1 |
|                                                                 | Actuation of emergency button (caregiver)                                                                               | 5.1            | 1.0 | 5.2            | 0.9 | 5.4          | 0.7 | 5.0                                | 1.1 |
| <i>Index: types of gathered data</i>                            | 3.7                                                                                                                     | 0.8            | 3.8 | 1.0            | 4.0 | 0.6          | 3.5 | 0.8                                |     |

|                                                                           |                                                                  |     |     |            |     |            |     |            |     |
|---------------------------------------------------------------------------|------------------------------------------------------------------|-----|-----|------------|-----|------------|-----|------------|-----|
| <b>Technologies to gather data<sup>b</sup></b><br>(12 items)              | Microphones <sup>a</sup>                                         | 2.3 | 1.4 | 2.4        | 1.4 | <b>2.8</b> | 1.3 | <b>2.1</b> | 1.3 |
|                                                                           | Ultrasonic sensors <sup>b</sup>                                  | 3.3 | 1.5 | <b>3.6</b> | 1.6 | <b>3.8</b> | 1.3 | <b>2.9</b> | 1.5 |
|                                                                           | Cameras                                                          | 2.2 | 1.3 | 2.4        | 1.3 | 2.6        | 1.4 | 2.0        | 1.2 |
|                                                                           | Infrared cameras <sup>a</sup>                                    | 2.5 | 1.4 | 2.6        | 1.5 | <b>2.9</b> | 1.5 | <b>2.3</b> | 1.2 |
|                                                                           | Motion sensors in rooms <sup>b</sup>                             | 3.4 | 1.6 | <b>3.8</b> | 1.7 | <b>3.9</b> | 1.2 | <b>2.9</b> | 1.6 |
|                                                                           | Fall sensors (floor) <sup>b</sup>                                | 4.8 | 1.4 | <b>5.0</b> | 1.3 | <b>5.2</b> | 0.9 | <b>4.5</b> | 1.5 |
|                                                                           | Fall sensors (clothing/on the body) <sup>b</sup>                 | 4.3 | 1.5 | <b>4.7</b> | 1.4 | <b>4.7</b> | 1.2 | <b>3.9</b> | 1.6 |
|                                                                           | Motion sensors (clothing/on the body of caretakers) <sup>b</sup> | 3.3 | 1.6 | <b>3.9</b> | 1.8 | <b>3.9</b> | 1.3 | <b>2.7</b> | 1.4 |
|                                                                           | Motion sensors (clothing/on the body of caregivers) <sup>b</sup> | 2.5 | 1.5 | <b>2.9</b> | 1.9 | 2.7        | 1.3 | <b>2.1</b> | 1.2 |
|                                                                           | Room sensors (air, temperature, ...)                             | 4.0 | 1.6 | 4.3        | 1.6 | 4.4        | 1.3 | 3.8        | 1.7 |
|                                                                           | Emergency button (caretaker) <sup>b</sup>                        | 5.1 | 1.1 | <b>5.4</b> | 0.7 | <b>5.4</b> | 0.8 | <b>4.8</b> | 1.4 |
|                                                                           | emergency button (caregiver)                                     | 5.1 | 1.2 | 5.2        | 1.2 | 5.2        | 0.9 | 5.0        | 1.2 |
| <i>Index: specific AAL technologies</i>                                   | 3.6                                                              | 0.9 | 3.9 | 1.0        | 3.9 | 0.7        | 3.2 | 0.9        |     |
| <b>Data access</b><br>(3 items)<br>(n.s.)                                 | Data may only be evaluated for the moment.                       | 3.9 | 1.2 | 2.7        | 1.2 | 3.2        | 1.2 | 2.9        | 1.2 |
|                                                                           | Data may be stored on a daily basis.                             | 2.9 | 1.2 | 2.9        | 1.3 | 2.8        | 1.1 | 3.0        | 1.3 |
|                                                                           | Data may be stored long term.                                    | 2.3 | 1.0 | 2.5        | 1.3 | 2.5        | 1.0 | 2.6        | 1.2 |
|                                                                           | <i>Index: data access</i>                                        | 2.8 | 1.1 | 2.7        | 1.1 | 2.8        | 1.0 | 2.8        | 1.2 |
| <b>Data storage</b><br>(3 items)<br>(n.s.)                                | Data may be accessed by colleagues.                              | 2.9 | 1.2 | 3.9        | 1.3 | 4.0        | 1.0 | 3.9        | 2.8 |
|                                                                           | Data may be accessed by direct supervisors.                      | 2.9 | 1.3 | 2.9        | 1.3 | 3.1        | 1.2 | 2.8        | 1.2 |
|                                                                           | Data may be accessed by all supervisors.                         | 2.5 | 1.2 | 2.3        | 1.0 | 2.4        | 1.1 | 2.2        | 1.0 |
|                                                                           | <i>Index: data storage</i>                                       | 3.0 | 0.9 | 3.1        | 1.0 | 3.1        | 0.7 | 2.9        | 0.9 |
| <b>Perceived benefits of AAL technology usage</b><br>(14 items)<br>(n.s.) | Relief in everyday life (caretaker)                              | 3.8 | 1.3 | 3.7        | 1.6 | 3.9        | 1.0 | 3.7        | 1.3 |
|                                                                           | Increase in safety (caretaker)                                   | 4.2 | 1.2 | 4.1        | 1.3 | 4.5        | 0.9 | 4.2        | 1.3 |
|                                                                           | Extension of independence (caretaker)                            | 3.7 | 1.4 | 3.8        | 1.5 | 4.0        | 1.2 | 3.6        | 1.5 |
|                                                                           | Decrease of dependence (caretaker)                               | 3.5 | 1.4 | 3.4        | 1.5 | 3.6        | 1.1 | 3.5        | 1.4 |
|                                                                           | Relief in everyday life (caregiver)                              | 3.8 | 1.4 | 3.8        | 1.6 | 3.8        | 1.2 | 3.7        | 1.4 |
|                                                                           | Fast help in emergencies                                         | 4.6 | 1.2 | 4.3        | 1.3 | 4.8        | 0.7 | 4.7        | 1.2 |
|                                                                           | Relief in documentation of care (caregiver)                      | 3.9 | 1.4 | 3.9        | 1.5 | 3.9        | 1.3 | 3.9        | 1.3 |
|                                                                           | Simplified proof of rendered care (caregiver)                    | 3.9 | 1.4 | 3.6        | 1.6 | 4.1        | 1.2 | 3.9        | 1.4 |
|                                                                           | Time savings in everyday working life (caregiver)                | 3.6 | 1.3 | 3.5        | 1.3 | 3.8        | 1.2 | 3.6        | 1.2 |
|                                                                           | Measure against crisis in care (caregiver)                       | 2.8 | 1.6 | 2.7        | 1.6 | 2.8        | 1.5 | 2.9        | 1.6 |
|                                                                           | Higher control in everyday working life (caregiver)              | 4.0 | 1.5 | 3.7        | 1.6 | 3.8        | 1.4 | 4.1        | 1.6 |
|                                                                           | Increase of life quality (caretaker)                             | 3.6 | 1.5 | 3.4        | 1.5 | 3.7        | 1.2 | 3.6        | 1.6 |
|                                                                           | Increase of working quality (caregiver)                          | 3.5 | 1.4 | 3.5        | 1.6 | 3.7        | 1.1 | 3.5        | 1.5 |
|                                                                           | Less fear of being able to do something wrong                    | 2.9 | 1.5 | 2.9        | 1.6 | 2.8        | 1.4 | 3.0        | 1.4 |
| <i>Index: perceived benefits</i>                                          | 3.7                                                              | 1.0 | 3.5 | 1.1        | 3.8 | 0.8        | 3.7 | 1.0        |     |
| <b>Perceived barriers of AAL technology usage</b><br>(17 items)<br>(n.s.) | Confrontation with new technology                                | 3.4 | 1.4 | 3.4        | 1.4 | 3.3        | 1.3 | 3.6        | 1.5 |
|                                                                           | Dependence on technology                                         | 4.7 | 1.2 | 4.4        | 1.4 | 4.5        | 1.2 | 4.9        | 1.1 |
|                                                                           | Surveillance by technology                                       | 5.0 | 1.1 | 4.9        | 1.2 | 4.7        | 1.3 | 5.2        | 1.0 |
|                                                                           | Invasion of privacy                                              | 5.2 | 1.0 | 5.1        | 1.1 | 5.1        | 1.0 | 5.3        | 1.0 |
|                                                                           | Recording of data                                                | 4.6 | 1.3 | 4.6        | 1.4 | 4.3        | 1.3 | 4.8        | 1.2 |
|                                                                           | Transfer of data                                                 | 4.7 | 1.3 | 4.6        | 1.4 | 4.4        | 1.3 | 4.8        | 1.2 |
|                                                                           | Fear of isolation                                                | 4.1 | 1.4 | 3.9        | 1.6 | 3.9        | 1.3 | 4.3        | 1.4 |
|                                                                           | Substitution of human care by technology                         | 4.8 | 1.4 | 4.5        | 1.5 | 4.6        | 1.5 | 4.9        | 1.4 |
|                                                                           | Usage seems to be too complex                                    | 3.5 | 1.3 | 3.2        | 1.3 | 3.3        | 1.2 | 3.7        | 1.4 |
|                                                                           | Control by colleagues                                            | 4.6 | 1.3 | 4.6        | 1.3 | 4.5        | 1.4 | 4.6        | 1.3 |
|                                                                           | Control by supervisors                                           | 4.9 | 1.2 | 4.9        | 1.2 | 4.8        | 1.2 | 4.9        | 1.2 |
|                                                                           | Unauthorized access of data from third parties                   | 4.7 | 1.2 | 4.4        | 1.5 | 4.5        | 1.3 | 4.8        | 1.1 |

|                                                                     |                                                                 |     |     |            |     |            |     |            |     |
|---------------------------------------------------------------------|-----------------------------------------------------------------|-----|-----|------------|-----|------------|-----|------------|-----|
|                                                                     | Data abuse by third parties                                     | 4.8 | 1.2 | 4.4        | 1.3 | 4.6        | 1.4 | 5.0        | 1.0 |
|                                                                     | Feeling to be not able to control the technology                | 3.9 | 1.4 | 3.6        | 1.4 | 3.5        | 1.4 | 4.2        | 1.4 |
|                                                                     | Missing trust in functionality of technology                    | 3.9 | 1.4 | 3.7        | 1.5 | 3.4        | 1.2 | 4.2        | 1.4 |
|                                                                     | Interruption of routines                                        | 3.9 | 1.3 | 4.0        | 1.5 | 3.7        | 1.0 | 3.9        | 1.3 |
|                                                                     | Time required for system operation                              | 3.8 | 1.3 | 3.4        | 1.4 | 3.6        | 1.2 | 4.0        | 1.3 |
|                                                                     | <i>Index: perceived barriers</i>                                | 4.4 | 0.7 | 4.2        | 0.8 | 4.2        | 0.6 | 4.6        | 0.7 |
| <i>Acceptance of the described AAL system (6 items)<sup>a</sup></i> | I can well imagine to use an AAL system. <sup>b</sup>           | 3.6 | 1.5 | 3.8        | 1.7 | <b>4.1</b> | 1.0 | <b>3.2</b> | 1.5 |
|                                                                     | An AAL system should be installed in our facility. <sup>a</sup> | 3.0 | 1.5 | <b>3.3</b> | 1.6 | <b>3.4</b> | 1.2 | <b>2.7</b> | 1.4 |
|                                                                     | I do not want to use such an AAL system. <sup>b</sup>           | 3.3 | 1.6 | 3.0        | 1.8 | <b>2.8</b> | 1.5 | <b>3.7</b> | 1.6 |
|                                                                     | I can benefit from an AAL system in many ways.                  | 3.5 | 1.5 | 3.8        | 1.8 | 3.7        | 1.1 | 3.3        | 1.4 |
|                                                                     | I do not see any advantage in such a system.                    | 3.1 | 1.5 | 3.0        | 1.7 | 2.8        | 1.1 | 3.3        | 1.5 |
|                                                                     | I find the described AAL system useful. <sup>a</sup>            | 3.6 | 1.4 | 3.8        | 1.7 | <b>3.9</b> | 1.0 | <b>3.3</b> | 1.4 |
|                                                                     | <i>Index: AAL technology Acceptance<sup>a</sup></i>             | 3.5 | 1.3 | 3.8        | 1.6 | <b>3.9</b> | 0.9 | <b>3.3</b> | 1.2 |

<sup>a</sup> $P < .05$ .

<sup>b</sup> $P < .01$ .

Means in bold mark the significant group differences based on post-hoc tests (Tukey's honestly significant difference test).
